## Drivers of inappropriate use of antimicrobials in South Asia:

### A systematic review of qualitative literature

Jennifer L. Murray<sup>1,2\*</sup>, Daniel T. Leung<sup>3</sup>, Olivia R. Hanson<sup>3</sup>, Sharia M. Ahmed<sup>3</sup>, Andrew T. Pavia<sup>3</sup>, Ashraful I. Khan<sup>4</sup>, Julia E. Szymczak<sup>3</sup>, Valerie M. Vaughn<sup>3</sup>, Payal K. Patel<sup>5</sup>, Debashish Biswas<sup>4</sup>, Melissa H. Watt<sup>1</sup>

<sup>1</sup> Department of Population Health Sciences, University of Utah, Salt Lake City, UT USA

<sup>2</sup> School of Medicine, University of Utah, Salt Lake City, UT USA

<sup>3</sup> Department of Internal Medicine, University of Utah, Salt Lake City, UT USA

<sup>4</sup> International Centre for Diarrhoeal Disease Research, Bangladesh (icddr,b), Dhaka, Bangladesh

<sup>5</sup> Department of Internal Medicine, Intermountain Health, Murray, UT

\*Corresponding author

E-mail: [jennifer.murray@hsc.utah.edu](mailto:jennifer.murray@hsc.utah.edu)

**Short title:** Qualitative review of inappropriate antimicrobial use in South Asia

## Abstract

Antimicrobial resistance is a global public health crisis. Effective antimicrobial stewardship requires an understanding of the factors and context that contribute to inappropriate use of antimicrobials. The goal of this qualitative systematic review was to synthesize themes across levels of the social ecological framework that drive inappropriate use of antimicrobials in South Asia. In September 2023, we conducted a systematic search using the electronic databases PubMed and Embase. Search terms, identified *a priori*, were related to research methods, topic, and geographic location. We identified 165 articles from the initial search and 8 upon reference review (n=173); after removing duplicates and preprints (n=12) and excluding those that did not meet eligibility criteria (n=115), 46 articles were included in the review. We assessed methodological quality using the qualitative Critical Appraisal Skills Program checklist. The studies represented 6 countries in South Asia, and included data from patients, health care providers, community members, and policy makers. For each manuscript, we wrote a summary memo to extract the factors that impede antimicrobial stewardship. We coded memos using NVivo software; codes were organized by levels of the social ecological framework. Barriers were identified at multiple levels including the patient (self-treatment with antimicrobials; perceived value of antimicrobials), the provider (antimicrobials as a universal therapy; gaps in knowledge and skills; financial or reputational incentives), the clinical setting (lack of resources; poor regulation of the facility), the community (access to formal health care; informal drug vendors; social norms), and policy (absence of a regulatory framework; poor implementation of existing policies). The findings highlight the importance of working across multiple sectors to design and implement approaches to antimicrobial stewardship in South Asia.

**Keywords:** Antimicrobial stewardship, Qualitative, Systematic review, South Asia, Antimicrobial resistance

## Introduction

The World Health Organization has identified antimicrobial resistance (AMR), the emergence and spread of pathogens resistant to antimicrobial agents, as one of the top ten global public health threats facing humanity (1). AMR is driven largely by misuse and overuse of antimicrobial agents within both the medical and agricultural sectors, which has increased over the last two decades (2). AMR threatens the efficacy of commonly used clinical antimicrobial agents, posing significant threats to human health. Infections associated with antimicrobial resistant bacteria, as opposed to a non-resistant form, confers two times the risk of a serious health outcome and three times the risk of mortality (3). It is estimated that in 2019 AMR directly resulted in 1.2 million deaths and was a contributing factor in almost 5 million additional deaths worldwide (4). If effective action to curb AMR development is not taken, it is estimated that by 2050, antimicrobial resistant diseases could result in 10 million deaths annually across the globe (5).

South Asia has seen a rapid increase in access to and use of antimicrobials, accompanied by a rise in AMR (6). Health services in many South Asian countries are fragmented and rely on an uncoordinated mix of private and public services. These fragmented health systems provide a space in which inappropriate antimicrobial use can go unchecked and AMR flourishes (7). The impact of AMR on human health in South Asia is profound. In India, nearly 60,000 newborns die each year as a direct result of AMR neonatal infections (8). A 2021 study found that Bangladeshi children with bacteremia resistant to all first- and second-line treatments had an increased risk of death compared to those with susceptible bacteria (9).

Antimicrobial stewardship is a holistic approach to facilitating responsible use and protection of antimicrobial agents through the combined efforts of individuals, organizations, institutions, and policies (10). The goal of stewardship is to reduce AMR and improve patient outcomes by ensuring that antimicrobials are used only when necessary, that appropriate

antimicrobials are chosen considering the risk of AMR, and that antimicrobials are used for the minimal duration necessary to treat infection (11). Antimicrobial stewardship programs typically focus on efforts in the health care system that promote the appropriate use of antimicrobials within a facility (12). However, the World Health Organization acknowledges that particularly in low- and middle-income country settings, antimicrobial stewardship requires the participation and buy-in of both formal and informal health care providers, community members, and patients (13). Reducing the inappropriate use of antimicrobials requires a change in human thought and behavior (14); therefore, interventions to promote antimicrobial stewardship need to be informed by the behavioral, social, cultural, and structural factors that shape how people use antimicrobials (15). Understanding the multi-level factors that contribute to inappropriate use of antimicrobials is a key step in designing strategies to combat AMR.

Qualitative methods (e.g. interviews, ethnography, focus groups) are well-suited to generate knowledge about the social determinants of antimicrobial overuse and the context in which AMR flourishes (16). Qualitative data contain in-depth insight elicited from research subjects in their own words, offering novel understanding of the actionable drivers of antimicrobial misuse. Systematic reviews of qualitative research are valuable in synthesizing across studies to identify commonalities across studies that can efficiently inform the design and implementation of antimicrobial stewardship (17). In this review paper, we aimed to synthesize themes across levels of the social ecological framework that drive inappropriate use of antimicrobials in South Asia. These findings can help identify areas for future research and intervention to prevent and mitigate AMR in South Asia.

## **Materials and methods**

### **Overview**

We conducted a systematic review of the literature and used thematic synthesis (18) to integrate findings across qualitative studies. In conducting this review, we adhered to the Preferred Reporting Items for Systematic Reviews and Meta-analyses (PRISMA) guidelines (19), with attention to the unique requirements for reporting qualitative research as outlined in the Enhancing Transparency in Reporting the Synthesis of Qualitative Research (ENTREQ) statement (20).

Studies were eligible to be included in the systematic review if they met the following criteria: 1) English language research paper in a peer-reviewed journal, 2) used qualitative methods (including in-depth interviews, focus group discussions, or ethnographic observations), 3) reported qualitative themes related to factors driving inappropriate use of antimicrobials, or factors impeding antimicrobial stewardship, 4) reported data related to the human consumption of antimicrobials, and 5) reported data collected in South Asia (defined by the World Bank as Afghanistan, Bangladesh, Bhutan, India, Maldives, Nepal, Pakistan, Sri Lanka) (21). Systematic reviews, opinion pieces, and editorials were excluded.

## **Search strategy and selection criteria**

In September 2023, we conducted a systematic search of the electronic databases PubMed and Embase. We identified search terms related to research method, topic, and location (Table 1). Search results from both databases were downloaded to Zotero for review. After eliminating duplicates, we reviewed abstracts to eliminate papers that did not meet the inclusion criteria. The full texts of all remaining papers were then reviewed to confirm that they met inclusion criteria. The reference lists of included papers were reviewed to identify any additional papers that missed in our search.

[INSERT TABLE 1 HERE]

## Critical appraisal

To assess the quality of the included studies, two individuals evaluated each paper using the Critical Appraisal Skills Program (CASP) for qualitative studies (22), and resolved any discrepancies by consensus. Following our CASP review, all studies met quality criteria of research objective, appropriate qualitative methodology, research design, recruitment strategy, and data collection methods.

## Data extraction and synthesis

We created a memo template to extract the themes reported in each study. The memos included information about the study, and a description of major themes that were reported across the levels of the social ecological framework (23). The social ecological framework was chosen as an organizing framework to facilitate identification and organization of barriers across different levels of influence. Table 2 describes how we defined each level of the social ecological framework for the purpose of this study.

[INSERT TABLE 2 HERE]

Each memo was reviewed by a second analyst for review and verification of the capture of findings from the original paper. Disagreements were resolved by consensus. The memos were uploaded into NVivo (version 12 Pro) qualitative data analysis software. Applied thematic analysis (24) was used to identify common themes across studies. We created a coding structure that included the levels of social ecological framework as the codes, and emerging themes under each level as the sub-codes. Two individuals dually coded all memos and met periodically to review and reconcile emerging codes. Discrepancies in coding were resolved by JM and MHW. After all memos were coded, the first author (JM) and last author (MHW) met to

review the coding structure, to merge and split codes as needed. Coding reports were analyzed, with reference to the source material as needed to synthesize and contextualize the findings.

## Results

### Included studies

The search and selection processes are summarized in Figure 1. The initial literature search yielded 165 results, and 8 additional publications were included upon reference review throughout the process for a total of 173 papers considered. After removing 11 duplicates and 1 preprint, 161 publications underwent abstract review, then 50 to full-text review. 46 publications were included in the final analysis (25–70), with publication dates ranging from 2010 to 2023. Table 3 includes a detailed description of the 46 publications that met criteria and were included in the final analysis.

[INSERT FIGURE 1 HERE]

[INSERT TABLE 3 HERE]

The papers represent 6 of the 8 South Asian countries of interest. India had the highest study representation (n=20), followed by Pakistan (n=12), Bangladesh (n=8), Nepal (n=4), then Bhutan and Sri Lanka (n=1 each). No studies were identified from the Maldives or Afghanistan. The studies used a wide variety of qualitative methodologies, the most common being individual interviews (n=37) and focus group discussions (n=13). Human subjects included patients, physicians (working in various specialties and sectors), nurses, pharmacists, community members (urban and rural, with various socioeconomic status), caregivers, government employees, national policy advisors, pharmaceutical industry staff, staff of nongovernmental

healthcare organizations, international policy body representatives, students and faculty, drug vendors, and informal healthcare providers.

Data extraction and synthesis revealed themes at each level of the social ecological framework (Figure 2). Table 4 provides brief descriptions of each of the 12 themes that emerged.

[INSERT FIGURE 2 HERE]

[INSERT TABLE 4 HERE]

## **Individual level: Patients and their caregivers**

Two major themes emerged at the individual level, representing the experiences and circumstances of patients and their caregivers: self-treatment with antimicrobials, and the perceived value of antimicrobials. Multiple studies reported that patients self-treat with antimicrobials due to multiple barriers, with socioeconomic status cited most frequently (27,28,30,45,48,53,70). For example, patients living in rural villages may not have adequate funds to travel to formal health care facilities and obtain diagnostic testing and prescriptions (26,37,51). Additionally, it was noted that patients and caregivers may be hesitant to seek medical care when they have “minor ailments,” due to the increased practice of referring out to specialized physicians which costs more money, additional time, and travel (71–73). Limited access to the formal health care system often leads patients to self-treat with antimicrobials when presenting with a wide variety of symptoms including diarrhea, stomach pain, cough, and fever by rationing antimicrobials (74–77). A patient’s decision to self-treat is informed by the perception that antimicrobials work based on prior therapeutic success with antimicrobials in themselves, family, or friends. Antimicrobials for self-treatment are obtained by receiving medication from a friend or family member, using leftover medication, or directly obtaining medication without a prescription from a pharmacy (65,74,75,78).



A number of studies reported the perception held by patients that the receipt of an antimicrobial prescription indicates high quality medical care, as antimicrobials are perceived as offering an objective and rapid solution to their illnesses (75,77,79,80). Overall, antimicrobials are perceived as powerful drugs that provide a quick solution to a range of ailments (81). Studies attribute this attitude to a lack of knowledge not only surrounding antimicrobial resistance, but more generally around medicine, diagnostics, and treatments (28,79,82–85). Additionally, caregivers report feeling a sense of emotional relief receiving an antimicrobial prescription because they believe it will successfully treat their children, elders, and other vulnerable groups (81,86). The high value placed on antimicrobials and belief in their power leads patients to expect and even demand antimicrobials when seeking medical care (87–89). Patients will “doctor shop” or seek care only from providers who are known to readily provide antimicrobials or pharmacies that are liberal with their distribution (65,90–92).

## **Interpersonal level: Formal health care workers**

Three major themes emerged at the interpersonal level, representing formal health care workers: antimicrobials as a universal therapy, gaps in knowledge and skills, and financial or reputational incentives. In multiple studies, participants spoke about how antimicrobials provide a cheap and accessible treatment plan for a wide variety of medical conditions, particularly in the absence of diagnostic and treatment options (71,82,90). Clinician participants described that it is common practice for providers to prescribe antimicrobials when they are unsure of a patient’s medical diagnosis, waiting for laboratory testing results, or even as a preventative measure to reduce the occurrence of secondary infections (71,89,93). Dispensing antimicrobials based on prior therapeutic success was described as an appropriate treatment for patients presenting with similar symptoms (82,89). Therefore, in many countries broad-spectrum antimicrobials was perceived as universal therapy for any general illness in conjunction with other common medications such as ibuprofen or acetaminophen (71,72,77,82,89). Some

providers directly handed medications to patients without writing a prescription or providing the medication name (77).

Many health care workers reported lacking knowledge surrounding antimicrobial stewardship and appropriate prescribing practices. Multiple studies with clinicians and students noted a lack of awareness of existing antimicrobial stewardship programs in their facilities, and an absence of training curricula on appropriate use of antimicrobials (94,95). Among clinicians with some understanding of antimicrobial resistance and/or stewardship programs, many held misconceptions or denied the severity of the problem (89,96). Others believed that specific medical specialties (e.g., surgery) or individuals in leadership (e.g., chief physicians) should be responsible for taking action and managing antimicrobial distribution in their own teams and departments (97,98).

Clinicians described the pressures they faced to dispense antibiotics to their patients. They noted that patients associated the dispensing of medications with a high level of care, leading them to dispense antimicrobials in hopes of increasing business and patient satisfaction (28,77,90). Business success is dependent on positive community reviews and reputation, leading clinicians to prioritize patient demands over clinical guidelines, especially with wealthy or influential patients (28,99). It was reported that pharmaceutical companies also play a role by providing financial incentives to providers for prescribing high volumes of certain antimicrobials and other medications (28,69,87,90,99–101).

## **Facility level: Clinical settings**

Two major themes emerged at the facility level, representing formal health care facilities: lack of resources, and poor regulation of the facility. Multiple studies reported a widespread shortage of medical infrastructure, equipment, and personnel across diverse settings, resulting in poor access to laboratory testing and diagnostics. In urban settings, there is a shortage of

hospital personnel paired with a high volume of patients, leading to the prescription of common antimicrobial regimens without in-depth assessment of patients or laboratory testing (82,88,95,99,102,103). Additionally, physicians are often unavailable or there are long wait times, prompting individuals to obtain antimicrobials on their own rather than access these formal facilities (28,66,77,84). Multiple studies also reported that in rural areas, treatment and testing facilities are lacking altogether, requiring patients to travel long distances to reach health facilities. As a response to these resource shortages in the formal health care system, informal medical practices and drug stores are common, where individuals may directly purchase antimicrobials without a prescription (84).

Studies showed conflicting accounts of antimicrobial availability and regulation within facilities. In India, Kotwani et al. report that public sector healthcare facilities will under- or over-prescribe antimicrobials based on their current stock, leading to inconsistent prescription patterns that encourage patients to share or obtain antimicrobials from community and family members (76). When antimicrobials are formally prescribed, facilities often lack or underuse drug reporting systems and do not maintain clinical documentation. Several studies noted the challenges of developing and implementing antimicrobial stewardship program, depending largely on the prioritization of leadership (81,97). The hierarchical structure of medical systems can be a barrier in implementing antimicrobial stewardship practices if senior physicians or leadership does not prioritize it (97).

## **Community level: Community practices and social norms**

Three major themes emerged at the community level: access to formal healthcare, informal drug vendors, and social norms. Studies described a multitude of systemic barriers to accessing the formal health care system, including rural areas with limited infrastructure, long wait times, poor quality of care, an inability to pay for services, or the complexity of navigating health systems (73,74,87). Instead of accessing formal care, many patients reported that they

instead relied on informal drug vendors who ran small drug stores that provided consultations and dispensed medications (65,72,74,75). These informal drug vendors report being commercially driven to sell medications and reach sales targets, often resulting in an over prescription of antimicrobials, inaccurate dosing, and the distribution of “half” antimicrobials which may be mixed with other materials (e.g., caffeine, routine pain medications) (28,74,85). In a study of informal healthcare providers in rural India, Khare et al. explained how informal drug vendors are an essential resource for rural and medically underserved communities, where antimicrobials are often handed out in response to a verbal description of symptoms or patient demand based on prior treatment success (91). The authors noted that without informal drug vendors, these patients would likely forego healthcare entirely.

Social norms surrounding the use of antimicrobials also emerged as a significant factor promoting inappropriate use. The sharing of antimicrobials between family and friends is a socially accepted and rooted practice in many South Asian settings (74). Additionally, individuals will often trade medical advice with their social networks and encourage others to obtain specific antimicrobials that treated their own symptoms in the past (86). In Bangladesh, Lucas et al. explained that women will typically ask their husbands for diagnostic or treatment advice rather than visiting a formal physician (73). Community norms related to antimicrobial use drive dispensing patterns. As mentioned at the interpersonal level, over-prescription of antimicrobials is common to retain patients and provide the perception of high-quality care that is associated with antimicrobials (28,102).

## **Policy level: Governance and legislation**

Two major themes emerged at the policy level: absence of a regulatory framework to monitor and control antimicrobials, and poor implementation of existing policies of antimicrobial stewardship. Studies across various countries noted that national, state, and local governments, and their policy infrastructures, were ultimately responsible for antimicrobial stewardship

programs (ASPs) in clinical settings. In a study of ASP development and implementation in India, Charani et al. (2019) conducted interviews with clinical providers in India and noted a lack of national infrastructure to legislate and control access to antimicrobials; strong local leadership and championing was necessary to make up for this shortcoming and create successful ASPs (98). Similar concerns about regulation and surveillance were identified in Pakistan among physicians (50) and pharmacists (65). The study by Hayat et al (2019) indicated several barriers in ASP implementation in hospitals, which could be overcome if the government were to provide necessary support, including legislation and funding (50). Other studies noted that even in countries with existing government regulation and legislation, it is difficult to navigate, understand, and consistently enforce these policies in clinical settings (67,69,70). In a study of policymakers and clinicians in Bhutan and Nepal, Maki et al. 2020 described policies related to prescription-only sales of antimicrobials, but a lack of enforcement in both the clinical and community settings (95).

## Discussion

We report the results of a qualitative systematic review of studies conducted in South Asian countries to examine the factors that drive inappropriate use of antimicrobials. Through the synthesis of findings reported in 46 qualitative studies, we identified multiple factors across five levels of the social ecological framework: the individual patient, the formal provider, the clinical setting, the community, and policy. Drivers of inappropriate use of antimicrobials were evident at all levels, highlighting the importance of working across multiple levels and sectors to address drivers of antimicrobial misuse and build commitment for stewardship in South Asia. These findings align with other systematic reviews and analyses of both qualitative and quantitative research on antimicrobial resistance and stewardship efforts around the world

(104–106), emphasizing the need for coordinated global action in addition to region-specific solutions.

The heterogeneity of South Asian healthcare systems presents significant barriers to antimicrobial stewardship. The studies in our analysis described regional differences in facility sizes and accessibility, administration involvement, government influence, licensure and formal education requirements of healthcare workers, pharmacy policies, and drug regulation programs. Further research is needed to assess these factors in countries that were under-represented in the literature, such as Afghanistan and the Maldives, so interventions can be specifically tailored by region. Most studies depicted fragmented systems in which there is little communication amongst formal providers within individual hospitals and clinics, health systems, and their greater communities. Improving this communication is crucial for the success of any intervention. Compared to studies in Sub-Saharan Africa and Latin America, the utilization of informal drug dispensers and unregulated community pharmacies is much more prevalent in South Asia (104,107). Therefore, it is essential for antimicrobial stewardship efforts in South Asia to target both formal and informal healthcare workers.

Both formal prescribers and informal drug dispensers face immense social and financial pressures from patients and pharmaceutical companies to liberally supply antimicrobials despite knowing about AMR and the resulting health consequences. Our data suggest that it is normative in many hospitals and clinics to order antimicrobials as a universal therapy to cover a variety of potential illnesses, appease patients, and generate pharmaceutical revenue. Shifting norms that are so embedded in the healthcare industry will require a multifaceted, longitudinal approach that encourages provider behavioral change. Potential solutions may include investing in the workforce to remove profit incentive of dispensing drugs, implementation of a regulatory framework to control antimicrobial prescribing in both public and private facilities, and required educational curriculum specific to antimicrobial stewardship in early stages of medical training to

facilitate a sense of ownership and responsibility as providers. Community pharmacies and informal drug dispensers should also be formally regulated to control the use of antimicrobials, though alternative opportunities for business revenue must be identified to encourage meaningful and sustainable change.

Patient expectations and demands were universally identified as a significant driver of inappropriate antimicrobial use. This is primarily driven by a larger systemic issue of healthcare inaccessibility, pushing individuals to demand antimicrobials during limited provider visits or seeking them in their communities and social networks instead. To effectively shift this cultural norm, increasing accessibility to care must be prioritized, especially in low-income and geographically isolated communities. Efforts might include investing in public transportation that extends to rural areas and villages, investing in education at all levels, and recruiting medical workers from underrepresented regions who are likely to return to those communities to practice. Existing facilities should expand to formally integrate laboratory testing and diagnostic equipment and should prioritize quality improvement to better serve patients. Additionally, public health campaigns and community health workers can better educate the general public on infection prevention and the negative impacts of antimicrobial overuse as has successfully been done in the Indian state of Kerala (108).

Our data suggested a dearth of policies addressing antimicrobial stewardship, and poor enforcement of existing policies. Interventions might include adopting a national antimicrobial monitoring system, requiring consults with pharmacists who have antimicrobial stewardship-specific expertise, providing financial incentives for infection prevention and reduced antimicrobial prescribing, or developing and requiring a national, standardized educational training for all antimicrobial dispensers (109–112). Policy reform and legislation alone are not sufficient to facilitate widespread antimicrobial stewardship nor combat resistance; it is also necessary to change individual behaviors and the embedded cultural norms that encourage

them. There are multiple public health programs that facilitate social and behavioral change at the individual, family, and community level (113). For example, water, sanitation and hygiene (WASH) activities are administered by local, regional, national, and international groups and are even embedded in national education curricula in China, the Democratic Republic of the Congo, Nicaragua, and Sudan (114). These efforts are successful due to a massive global coordination and multi-sector participation in WASH activities. Similar efforts must be made for antimicrobial stewardship to address the global health threat of antimicrobial resistance and its devastating health effects.

It's important to note some limitations of the study. First, this review focused on overuse and misuse of antimicrobials in human populations, and did not include other significant drivers of AMR, such as antimicrobial use in livestock (115), environmental changes (116), and water and sanitation systems (117,118). A review of AMR in South Asia in a One Health framework (119) would be a valuable addition to the literature. Second, given the unequal representation of South Asian countries in the existing literature, these findings may not be generalizable to all of South Asia. The limited literature could be in part due to bias in research funding and publication. Additionally, we only included studies published in English, potentially excluding studies that are otherwise eligible. Finally, although there was an established and detailed search methodology, it is possible that published studies that fit criteria were missed. However, we are confident that thematic saturation was reached as clear and consistent themes emerged across the included manuscripts.

## Conclusions

Antimicrobial resistance is a major threat to individual and population health in South Asia. As common antimicrobials become less efficacious due to antimicrobial-resistant organisms, there is a risk of significant increases in morbidity and mortality in the region. In



synthesizing the qualitative literature in South Africa, we identified a range of norms, behaviors, and policy contexts that contribute to antimicrobial resistance in South Asia. The findings point to a need for a multi-pronged approach that works across sectors to improve the surveillance and reporting of antimicrobial use and implement stewardship interventions specific to the unique regions.

## Registration and protocol

The protocol for the systematic review was registered with PROSPERO (CRD42023456791).

Available from: [https://www.crd.york.ac.uk/prospero/display\\_record.php?ID=CRD42023456791](https://www.crd.york.ac.uk/prospero/display_record.php?ID=CRD42023456791)

## Acknowledgements

The following individuals helped to support the review process: Nehal Bakshi, Anya Tiwari, and Maya Stephens.

## Financial Disclosure Statement

This systematic review was accomplished with the support of the following grant funding: R01 AI135114 (PI: Leung); R21 HD109819 (PI: Leung).

## Competing Interests

The authors declare that they have no competing interests.

## References

1. Antimicrobial resistance [Internet]. [cited 2023 Feb 1]. Available from: <https://www.who.int/news-room/fact-sheets/detail/antimicrobial-resistance>
2. Browne AJ, Chipeta MG, Haines-Woodhouse G, Kumaran EPA, Hamadani BHK, Zarea S, et al. Global antibiotic consumption and usage in humans, 2000–18: a spatial modelling study. *Lancet Planet Health*. 2021 Dec 1;5(12):e893–904.
3. Antimicrobial-Resistance-in-G7-Countries-and-Beyond.pdf [Internet]. [cited 2023 Mar 2]. Available from: <https://www.oecd.org/els/health-systems/Antimicrobial-Resistance-in-G7-Countries-and-Beyond.pdf>
4. Murray CJ, Ikuta KS, Sharara F, Swetschinski L, Aguilar GR, Gray A, et al. Global burden of bacterial antimicrobial resistance in 2019: a systematic analysis. *The Lancet*. 2022 Feb 12;399(10325):629–55.
5. New report calls for urgent action to avert antimicrobial resistance crisis [Internet]. [cited 2023 Mar 2]. Available from: <https://www.who.int/news/item/29-04-2019-new-report-calls-for-urgent-action-to-avert-antimicrobial-resistance-crisis>
6. Zellweger RM, Carrique-Mas J, Limmathurotsakul D, Day NPJ, Thwaites GE, Baker S, et al. A current perspective on antimicrobial resistance in Southeast Asia. *J Antimicrob Chemother*. 2017 Nov 1;72(11):2963–72.
7. Holloway KA, Kotwani A, Batmanabane G, Puri M, Tisocki K. Antibiotic use in South East Asia and policies to promote appropriate use: reports from country situational analyses. *The BMJ*. 2017 Sep 4;358:j2291.
8. TACKLING DRUG-RESISTANT INFECTIONS GLOBALLY: FINAL REPORT AND RECOMMENDATIONS: THE REVIEW ON ANTIMICROBIAL RESISTANCE [Internet]. [cited 2023 Mar 2]. Available from: [https://amr-review.org/sites/default/files/160518\\_Final%20paper\\_with%20cover.pdf](https://amr-review.org/sites/default/files/160518_Final%20paper_with%20cover.pdf)
9. Chisti MJ, Harris JB, Carroll RW, Shahunja KM, Shahid ASMSB, Moschovis PP, et al. Antibiotic-Resistant Bacteremia in Young Children Hospitalized With Pneumonia in Bangladesh Is Associated With a High Mortality Rate. *Open Forum Infect Dis*. 2021 Jul 1;8(7):ofab260.
10. Shrestha J, Zahra F, Cannady J. Antimicrobial Stewardship. In: *StatPearls* [Internet]. Treasure Island (FL): StatPearls Publishing; 2023 [cited 2023 Jul 26]. Available from: <http://www.ncbi.nlm.nih.gov/books/NBK572068/>
11. Current Report | Antibiotic Use | CDC [Internet]. 2022 [cited 2023 Mar 2]. Available from: <https://www.cdc.gov/antibiotic-use/stewardship-report/current.html>
12. Antimicrobial stewardship programmes in health-care facilities in low- and middle-income countries: a WHO practical toolkit. *JAC-Antimicrob Resist*. 2019 Dec 1;1(3):dlz072.

13. World Health Organization. Antimicrobial stewardship programmes in health-care facilities in low- and middle-income countries: a WHO practical toolkit [Internet]. Geneva: World Health Organization; 2019 [cited 2023 Aug 10]. 71 p. Available from: <https://apps.who.int/iris/handle/10665/329404>
14. Szymczak, J. E. & Newland, J. (2018). The Social Determinants of Antimicrobial Prescribing: Implications for Stewardship. In: Barlam, T. F., Neuhauser, M. M., Trivedi, K. K. & Tamma, P. D. (eds.) Society for Healthcare Epidemiology of America: Practical Implementation of an Antimicrobial Stewardship Program. Cambridge University Press.
15. Lorencatto F, Charani E, Sevdalis N, Tarrant C, Davey P. Driving sustainable change in antimicrobial prescribing practice: how can social and behavioural sciences help? *J Antimicrob Chemother.* 2018 Oct 1;73(10):2613–24.
16. Woods-Hill CZ, Xie A, Lin J, Wolfe HA, Plattner AS, Malone S, et al. Numbers and narratives: how qualitative methods can strengthen the science of paediatric antimicrobial stewardship. *JAC-Antimicrob Resist.* 2022 Mar;4(1):dlab195.
17. Seers K. Qualitative systematic reviews: their importance for our understanding of research relevant to pain. *Br J Pain.* 2015 Feb;9(1):36–40.
18. Thomas J, Harden A. Methods for the thematic synthesis of qualitative research in systematic reviews. *BMC Med Res Methodol.* 2008 Dec;8(1):45.
19. Page MJ, McKenzie JE, Bossuyt PM, Boutron I, Hoffmann TC, Mulrow CD, et al. The PRISMA 2020 statement: an updated guideline for reporting systematic reviews. *BMJ.* 2021 Mar 29;n71.
20. Tong A, Flemming K, McInnes E, Oliver S, Craig J. Enhancing transparency in reporting the synthesis of qualitative research: ENTREQ. *BMC Med Res Methodol.* 2012 Nov 27;12:181.
21. World Bank [Internet]. [cited 2022 Sep 29]. South Asia. Available from: <https://www.worldbank.org/en/region/sar>
22. Critical Appraisal Skills Programme (2022). CASP Qualitative Studies Checklist. [online] Available at: <https://casp-uk.net/images/checklist/documents/CASP-Qualitative-Studies-Checklist/CASP-Qualitative-Checklist-2018.pdf>. Accessed: October 2022.
23. Bronfenbrenner U. Toward an experimental ecology of human development. *Am Psychol.* 1977 Jul;32(7):513–31.
24. Guest G, MacQueen KM, Namey EE. *Applied Thematic Analysis*. Thousand Oaks, CA: SAGE; 2012.
25. Biswas D, Hossin R, Rahman M, Bardosh KL, Watt MH, Zion MI, et al. An ethnographic exploration of diarrheal disease management in public hospitals in Bangladesh: From problems to solutions. *Soc Sci Med* 1982. 2020 Sep;260:113185.
26. Adhikari B, Pokharel S, Raut S, Adhikari J, Thapa S, Paudel K, et al. Why do people purchase antibiotics over-the-counter? A qualitative study with patients, clinicians and dispensers in central, eastern and western Nepal. *BMJ Glob Health.* 2021 May;6(5):e005829.

27. Atif M, Ihsan B, Malik I, Ahmad N, Saleem Z, Sehar A, et al. Antibiotic stewardship program in Pakistan: a multicenter qualitative study exploring medical doctors' knowledge, perception and practices. *BMC Infect Dis*. 2021 Dec;21(1):374.
28. Chandy SJ, Mathai E, Thomas K, Faruqui AR, Holloway K, Lundborg CS. Antibiotic use and resistance: perceptions and ethical challenges among doctors, pharmacists and the public in Vellore, South India. *Indian J Med Ethics*. 2013 Mar;10(1):20–7.
29. Kalam MA, Shano S, Afrose S, Uddin MN, Rahman N, Jalal FA, et al. Antibiotics in the Community During the COVID-19 Pandemic: A Qualitative Study to Understand Users' Perspectives of Antibiotic Seeking and Consumption Behaviors in Bangladesh. *Patient Prefer Adherence*. 2022 Jan;Volume 16:217–33.
30. Broom J, Broom A, Kenny K, Chittem M. Antimicrobial overuse in India: A symptom of broader societal issues including resource limitations and financial pressures. *Glob Public Health*. 2021 Jul 3;16(7):1079–87.
31. Rolfe R, Kwobah C, Muro F, Ruwanpathirana A, Lyamuya F, Bodinayake C, et al. Barriers to implementing antimicrobial stewardship programs in three low- and middle-income country tertiary care settings: findings from a multi-site qualitative study. *Antimicrob Resist Infect Control*. 2021 Dec;10(1):60.
32. Atif M, Asghar S, Mushtaq I, Malik I. Community pharmacists as antibiotic stewards: A qualitative study exploring the current status of Antibiotic Stewardship Program in Bahawalpur, Pakistan. *J Infect Public Health*. 2020 Jan;13(1):118–24.
33. Do NTT, Vu HTL, Nguyen CTK, Punpuing S, Khan WA, Gyapong M, et al. Community-based antibiotic access and use in six low-income and middle-income countries: a mixed-method approach. *Lancet Glob Health*. 2021 May;9(5):e610–9.
34. Khan FU, Mallhi TH, Khan FU, Hayat K, Rehman AsimU, Shah S, et al. Evaluation of Consumers Perspective on the Consumption of Antibiotics, Antibiotic Resistance, and Recommendations to Improve the Rational use of Antibiotics: An Exploratory Qualitative Study From Post-Conflicted Region of Pakistan. *Front Pharmacol*. 2022 May 18;13:881243.
35. Anwar M, Raziq A, Shoaib M, Baloch NS, Raza S, Sajjad B, et al. Exploring Nurses' Perception of Antibiotic Use and Resistance: A Qualitative Inquiry. *J Multidiscip Healthc*. 2021 Jun;Volume 14:1599–608.
36. Khan FU, Khan A, Shah S, Hayat K, Usman A, Khan FU, et al. Exploring Undergraduate Pharmacy Students Perspectives Towards Antibiotics Use, Antibiotic Resistance, and Antibiotic Stewardship Programs Along With the Pharmacy Teachers' Perspectives: A Mixed-Methods Study From Pakistan. *Front Pharmacol*. 2021 Nov 8;12:754000.
37. Kotwani A, Wattal C, Katewa S, Joshi PC, Holloway K. Factors influencing primary care physicians to prescribe antibiotics in Delhi India. *Fam Pract*. 2010 Dec 1;27(6):684–90.

38. Maki G, Smith I, Paulin S, Kaljee L, Kasambara W, Mlotha J, et al. Feasibility Study of the World Health Organization Health Care Facility-Based Antimicrobial Stewardship Toolkit for Low- and Middle-Income Countries. *Antibiotics*. 2020 Aug 29;9(9):556.
39. Broom A, Kenny K, Kirby E, George N, Chittem M. Improvisation, therapeutic brokerage and antibiotic (mis)use in India: a qualitative interview study of Hyderabad physicians and pharmacists. *Crit Public Health*. 2020 Jan 1;30(1):16–27.
40. Singh S, Mendelson M, Surendran S, Bonaconsa C, Mbamalu O, Nampoothiri V, et al. Investigating infection management and antimicrobial stewardship in surgery: a qualitative study from India and South Africa. *Clin Microbiol Infect Off Publ Eur Soc Clin Microbiol Infect Dis*. 2021 Oct;27(10):1455–64.
41. Charani E, Smith I, Skodvin B, Perozziello A, Lucet JC, Lescure FX, et al. Investigating the cultural and contextual determinants of antimicrobial stewardship programmes across low-, middle- and high-income countries—A qualitative study. Cartelle Gestal M, editor. *PLOS ONE*. 2019 Jan 16;14(1):e0209847.
42. Kotwani A, Wattal C, Joshi PC, Holloway K. Irrational use of antibiotics and role of the pharmacist: an insight from a qualitative study in New Delhi, India: Antibiotic dispensing practices of pharmacists in New Delhi. *J Clin Pharm Ther*. 2012 Jun;37(3):308–12.
43. Khan MS, Bory S, Rego S, Suy S, Durrance-Bagale A, Sultana Z, et al. Is enhancing the professionalism of healthcare providers critical to tackling antimicrobial resistance in low- and middle-income countries? *Hum Resour Health*. 2020 Dec;18(1):10.
44. Pearson M, Chandler C. Knowing antimicrobial resistance in practice: a multi-country qualitative study with human and animal healthcare professionals. *Glob Health Action*. 2019;12(1):1599560.
45. Kotwani A, Joshi J, Lamkang AS, Sharma A, Kaloni D. Knowledge and behavior of consumers towards the non-prescription purchase of antibiotics: An insight from a qualitative study from New Delhi, India. *Pharm Pract*. 2021 Mar 21;19(1):2206.
46. Kotwani A, Wattal C, Joshi P, Holloway K. Knowledge and perceptions on antibiotic use and resistance among high school students and teachers in New Delhi, India: A qualitative study. *Indian J Pharmacol*. 2016;48(4):365.
47. Khan FU, Khan FU, Hayat K, Ahmad T, Khan A, Chang J, et al. Knowledge, Attitude, and Practice on Antibiotics and Its Resistance: A Two-Phase Mixed-Methods Online Study among Pakistani Community Pharmacists to Promote Rational Antibiotic Use. *Int J Environ Res Public Health*. 2021 Feb 1;18(3):1320.
48. Kotwani A, Joshi J, Lamkang AS. Over-the-Counter Sale of Antibiotics in India: A Qualitative Study of Providers' Perspectives across Two States. *Antibiotics*. 2021 Sep 17;10(9):1123.
49. Lucas PJ, Uddin MR, Khisa N, Akter SMS, Unicomb L, Nahar P, et al. Pathways to antibiotics in Bangladesh: A qualitative study investigating how and when households access medicine including antibiotics for humans or animals when they are ill. *PLoS One*. 2019;14(11):e0225270.

50. Hayat K, Rosenthal M, Gillani AH, Zhai P, Aziz MM, Ji W, et al. Perspective of Pakistani Physicians towards Hospital Antimicrobial Stewardship Programs: A Multisite Exploratory Qualitative Study. *Int J Environ Res Public Health*. 2019 May 5;16(9):1565.
51. Darj E, Newaz MS, Zaman MH. Pharmacists' perception of their challenges at work, focusing on antimicrobial resistance: a qualitative study from Bangladesh. *Glob Health Action*. 2019;12(sup1):1735126.
52. Kotwani A, Joshi P, Jhamb U, Holloway K. Prescriber and dispenser perceptions about antibiotic use in acute uncomplicated childhood diarrhea and upper respiratory tract infection in New Delhi: Qualitative study. *Indian J Pharmacol*. 2017;49(6):419.
53. Chowdhury M, Stewart Williams J, Wertheim H, Khan WA, Matin A, Kinsman J. Rural community perceptions of antibiotic access and understanding of antimicrobial resistance: qualitative evidence from the Health and Demographic Surveillance System site in Matlab, Bangladesh. *Glob Health Action*. 2019 Dec 13;12(sup1):1824383.
54. Barker AK, Brown K, Ahsan M, Sengupta S, Safdar N. Social determinants of antibiotic misuse: a qualitative study of community members in Haryana, India. *BMC Public Health*. 2017 Dec;17(1):333.
55. Khare S, Pathak A, Stålsby Lundborg C, Diwan V, Atkins S. Understanding Internal and External Drivers Influencing the Prescribing Behaviour of Informal Healthcare Providers with Emphasis on Antibiotics in Rural India: A Qualitative Study. *Antibiotics*. 2022 Mar 29;11(4):459.
56. Kalam A, Shano S, Khan MA, Islam A, Warren N, Hassan MM, et al. Understanding the social drivers of antibiotic use during COVID-19 in Bangladesh: Implications for reduction of antimicrobial resistance. Cartelle Gestal M, editor. *PLOS ONE*. 2021 Dec 14;16(12):e0261368.
57. Nahar P, Unicomb L, Lucas PJ, Uddin MR, Islam MA, Nizame FA, et al. What contributes to inappropriate antibiotic dispensing among qualified and unqualified healthcare providers in Bangladesh? A qualitative study. *BMC Health Serv Res*. 2020 Dec;20(1):656.
58. Nair M, Tripathi S, Mazumdar S, Mahajan R, Harshana A, Pereira A, et al. "Without antibiotics, I cannot treat": A qualitative study of antibiotic use in Paschim Bardhaman district of West Bengal, India. Daivadanam M, editor. *PLOS ONE*. 2019 Jun 27;14(6):e0219002.
59. Atif M, Asghar S, Mushtaq I, Malik I, Amin A, Babar ZUD, et al. What drives inappropriate use of antibiotics? A mixed methods study from Bahawalpur, Pakistan. *Infect Drug Resist*. 2019;12:687–99.
60. Barker AK, Brown K, Ahsan M, Sengupta S, Safdar N. What drives inappropriate antibiotic dispensing? A mixed-methods study of pharmacy employee perspectives in Haryana, India. *BMJ Open*. 2017 Mar 2;7(3):e013190.
61. Baubie K, Shaughnessy C, Kostiuik L, Varsha Joseph M, Safdar N, Singh SK, et al. Evaluating antibiotic stewardship in a tertiary care hospital in Kerala, India: a qualitative interview study. *BMJ Open*. 2019 May 14;9(5):e026193.

62. Joseph HA, Agboatwalla M, Hurd J, Jacobs-Slifka K, Pitz A, Bowen A. What Happens When “Germs Don’t Get Killed and They Attack Again and Again”: Perceptions of Antimicrobial Resistance in the Context of Diarrheal Disease Treatment Among Laypersons and Health-Care Providers in Karachi, Pakistan. *Am J Trop Med Hyg.* 2016 Jul 6;95(1):221–8.
63. Sahoo KC, Tamhankar AJ, Johansson E, Lundborg CS. Antibiotic use, resistance development and environmental factors: a qualitative study among healthcare professionals in Orissa, India. *BMC Public Health.* 2010 Oct 21;10:629.
64. Saleem Z, Hassali MA, Godman B, Hashmi FK, Saleem F. Antimicrobial prescribing and determinants of antimicrobial resistance: a qualitative study among physicians in Pakistan. *Int J Clin Pharm.* 2019 Oct;41(5):1348–58.
65. Farooqui M, Iqbal Z, Sadiq A, Raziq A, Alshammari MS, Iqbal Q, et al. Hospital Pharmacists’ Viewpoint on Quality Use of Antibiotics and Resistance: A Qualitative Exploration from a Tertiary Care Hospital of Quetta City, Pakistan. *Antibiot Basel Switz.* 2023 Aug 21;12(8):1343.
66. Inchara M, Reddy MM, Ramya N. “Perceptions” and “practices” to antibiotic usage among diabetic patients receiving care from a rural tertiary care center: A mixed-methods study. *J Educ Health Promot.* 2022;11:181.
67. Kotwani A, Gandra S. Strengthening antimicrobial stewardship activities in secondary and primary public healthcare facilities in India: Insights from a qualitative study with stakeholders. *Indian J Med Microbiol.* 2023;41:59–63.
68. Mitchell J, Cooke P, Arjyal A, Baral S, Jones N, Garbovan L, et al. Exploring the potential for children to act on antimicrobial resistance in Nepal: Valuable insights from secondary analysis of qualitative data. *PloS One.* 2023;18(6):e0285882.
69. Nair M, Engel N, Zeegers MP, Burza S. Perceptions of effective policy interventions and strategies to address antibiotic misuse within primary healthcare in India: A qualitative study. *J Infect Prev.* 2023 May;24(3):113–8.
70. Shrestha A, Shrestha R, Koju P, Tamrakar S, Rai A, Shrestha P, et al. The Resistance Patterns in *E. coli* Isolates among Apparently Healthy Adults and Local Drivers of Antimicrobial Resistance: A Mixed-Methods Study in a Suburban Area of Nepal. *Trop Med Infect Dis.* 2022 Jul 12;7(7):133.
71. Darj E, Newaz MS, Zaman MH. Pharmacists’ perception of their challenges at work, focusing on antimicrobial resistance: a qualitative study from Bangladesh. *Glob Health Action.* 2019;12(sup1):1735126.
72. Kotwani A, Joshi J. Over-the-counter sale of antibiotics - Using Net-Map to identify and segment stakeholders as the first step towards the development of smart regulation. *Indian J Med Microbiol.* 2021 Apr;39(2):184–7.
73. Lucas PJ, Uddin MR, Khisa N, Akter SMS, Unicomb L, Nahar P, et al. Pathways to antibiotics in Bangladesh: A qualitative study investigating how and when households access medicine including antibiotics for humans or animals when they are ill. *PloS One.* 2019;14(11):e0225270.

74. Adhikari B, Pokharel S, Raut S, Adhikari J, Thapa S, Paudel K, et al. Why do people purchase antibiotics over-the-counter? A qualitative study with patients, clinicians and dispensers in central, eastern and western Nepal. *BMJ Glob Health*. 2021 May;6(5):e005829.
75. Do NTT, Vu HTL, Nguyen CTK, Punpuing S, Khan WA, Gyapong M, et al. Community-based antibiotic access and use in six low-income and middle-income countries: a mixed-method approach. *Lancet Glob Health*. 2021 May;9(5):e610–9.
76. Kotwani A, Wattal C, Joshi PC, Holloway K. Irrational use of antibiotics and role of the pharmacist: an insight from a qualitative study in New Delhi, India: Antibiotic dispensing practices of pharmacists in New Delhi. *J Clin Pharm Ther*. 2012 Jun;37(3):308–12.
77. Kotwani A, Joshi J, Lamkang AS, Sharma A, Kaloni D. Knowledge and behavior of consumers towards the non-prescription purchase of antibiotics: An insight from a qualitative study from New Delhi, India. *Pharm Pract*. 2021 Mar 21;19(1):2206.
78. Khan FU, Khan FU, Hayat K, Ahmad T, Khan A, Chang J, et al. Knowledge, Attitude, and Practice on Antibiotics and Its Resistance: A Two-Phase Mixed-Methods Online Study among Pakistani Community Pharmacists to Promote Rational Antibiotic Use. *Int J Environ Res Public Health*. 2021 Feb 1;18(3):1320.
79. Khan FU, Mallhi TH, Khan FU, Hayat K, Rehman AsimU, Shah S, et al. Evaluation of Consumers Perspective on the Consumption of Antibiotics, Antibiotic Resistance, and Recommendations to Improve the Rational use of Antibiotics: An Exploratory Qualitative Study From Post-Conflicted Region of Pakistan. *Front Pharmacol*. 2022 May 18;13:881243.
80. Chowdhury M, Stewart Williams J, Wertheim H, Khan WA, Matin A, Kinsman J. Rural community perceptions of antibiotic access and understanding of antimicrobial resistance: qualitative evidence from the Health and Demographic Surveillance System site in Matlab, Bangladesh. *Glob Health Action*. 2019 Dec 13;12(sup1):1824383.
81. Kalam A, Shano S, Khan MA, Islam A, Warren N, Hassan MM, et al. Understanding the social drivers of antibiotic use during COVID-19 in Bangladesh: Implications for reduction of antimicrobial resistance. *Cartelle Gestal M, editor. PLOS ONE*. 2021 Dec 14;16(12):e0261368.
82. Atif M, Ihsan B, Malik I, Ahmad N, Saleem Z, Sehar A, et al. Antibiotic stewardship program in Pakistan: a multicenter qualitative study exploring medical doctors' knowledge, perception and practices. *BMC Infect Dis*. 2021 Apr 21;21(1):374.
83. Atif M, Asghar S, Mushtaq I, Malik I. Community pharmacists as antibiotic stewards: A qualitative study exploring the current status of Antibiotic Stewardship Program in Bahawalpur, Pakistan. *J Infect Public Health*. 2020 Jan;13(1):118–24.
84. Barker AK, Brown K, Ahsan M, Sengupta S, Safdar N. Social determinants of antibiotic misuse: a qualitative study of community members in Haryana, India. *BMC Public Health*. 2017 Dec;17(1):333.



85. Nahar P, Unicomb L, Lucas PJ, Uddin MR, Islam MA, Nizame FA, et al. What contributes to inappropriate antibiotic dispensing among qualified and unqualified healthcare providers in Bangladesh? A qualitative study. *BMC Health Serv Res*. 2020 Jul 15;20(1):656.
86. Kalam MA, Shano S, Afrose S, Uddin MN, Rahman N, Jalal FA, et al. Antibiotics in the Community During the COVID-19 Pandemic: A Qualitative Study to Understand Users' Perspectives of Antibiotic Seeking and Consumption Behaviors in Bangladesh. *Patient Prefer Adherence*. 2022 Jan;Volume 16:217–33.
87. Broom J, Broom A, Kenny K, Chittem M. Antimicrobial overuse in India: A symptom of broader societal issues including resource limitations and financial pressures. *Glob Public Health*. 2021 Jul 3;16(7):1079–87.
88. Anwar M, Raziq A, Shoaib M, Baloch NS, Raza S, Sajjad B, et al. Exploring Nurses' Perception of Antibiotic Use and Resistance: A Qualitative Inquiry. *J Multidiscip Healthc*. 2021 Jun;Volume 14:1599–608.
89. Nair M, Tripathi S, Mazumdar S, Mahajan R, Harshana A, Pereira A, et al. "Without antibiotics, I cannot treat": A qualitative study of antibiotic use in Paschim Bardhaman district of West Bengal, India. Daivadanam M, editor. *PLOS ONE*. 2019 Jun 27;14(6):e0219002.
90. Kotwani A, Wattal C, Katewa S, Joshi PC, Holloway K. Factors influencing primary care physicians to prescribe antibiotics in Delhi India. *Fam Pract*. 2010 Dec 1;27(6):684–90.
91. Khare S, Pathak A, Stålsby Lundborg C, Diwan V, Atkins S. Understanding Internal and External Drivers Influencing the Prescribing Behaviour of Informal Healthcare Providers with Emphasis on Antibiotics in Rural India: A Qualitative Study. *Antibiotics*. 2022 Mar 29;11(4):459.
92. Hayat K, Rosenthal M, Hassan Gillani A, Zhai P, Ji W, Chang J, et al. What Are the Views Among Pakistani Physicians Toward Antimicrobial Resistance and Hospital Antimicrobial Stewardship Programs? A Multi-Site Qualitative Study. *Open Forum Infect Dis*. 2019 Oct 23;6(Supplement\_2):S681–S681.
93. Pearson M, Chandler C. Knowing antimicrobial resistance in practice: a multi-country qualitative study with human and animal healthcare professionals. *Glob Health Action*. 2019;12(1):1599560.
94. Khan FU, Khan A, Shah S, Hayat K, Usman A, Khan FU, et al. Exploring Undergraduate Pharmacy Students Perspectives Towards Antibiotics Use, Antibiotic Resistance, and Antibiotic Stewardship Programs Along With the Pharmacy Teachers' Perspectives: A Mixed-Methods Study From Pakistan. *Front Pharmacol*. 2021 Nov 8;12:754000.
95. Maki G, Smith I, Paulin S, Kaljee L, Kasambara W, Mlotha J, et al. Feasibility Study of the World Health Organization Health Care Facility-Based Antimicrobial Stewardship Toolkit for Low- and Middle-Income Countries. *Antibiotics*. 2020 Aug 29;9(9):556.
96. Kotwani A, Joshi P, Jhamb U, Holloway K. Prescriber and dispenser perceptions about antibiotic use in acute uncomplicated childhood diarrhea and upper respiratory tract infection in New Delhi: Qualitative study. *Indian J Pharmacol*. 2017;49(6):419.

97. Singh S, Mendelson M, Surendran S, Bonaconsa C, Mbamalu O, Nampoothiri V, et al. Investigating infection management and antimicrobial stewardship in surgery: a qualitative study from India and South Africa. *Clin Microbiol Infect*. 2021 Oct;27(10):1455–64.
98. Charani E, Smith I, Skodvin B, Perozziello A, Lucet JC, Lescure FX, et al. Investigating the cultural and contextual determinants of antimicrobial stewardship programmes across low-, middle- and high-income countries—A qualitative study. Cartelle Gestal M, editor. *PLOS ONE*. 2019 Jan 16;14(1):e0209847.
99. Biswas D, Hossin R, Rahman M, Bardosh KL, Watt MH, Zion MI, et al. An ethnographic exploration of diarrheal disease management in public hospitals in Bangladesh: From problems to solutions. *Soc Sci Med* 1982. 2020 Sep;260:113185.
100. Broom A, Kenny K, Kirby E, George N, Chittem M. Improvisation, therapeutic brokerage and antibiotic (mis)use in India: a qualitative interview study of Hyderabadi physicians and pharmacists. *Crit Public Health*. 2020 Jan 1;30(1):16–27.
101. Khan MS, Bory S, Rego S, Suy S, Durrance-Bagale A, Sultana Z, et al. Is enhancing the professionalism of healthcare providers critical to tackling antimicrobial resistance in low- and middle-income countries? *Hum Resour Health*. 2020 Feb 11;18(1):10.
102. Broom J, Broom A, Kenny K, Chittem M. Antimicrobial overuse in India: A symptom of broader societal issues including resource limitations and financial pressures. *Glob Public Health*. 2021 Jul 3;16(7):1079–87.
103. Rolfe R, Kwobah C, Muro F, Ruwanpathirana A, Lyamuya F, Bodinayake C, et al. Barriers to implementing antimicrobial stewardship programs in three low- and middle-income country tertiary care settings: findings from a multi-site qualitative study. *Antimicrob Resist Infect Control*. 2021 Dec;10(1):60.
104. Porter GJ, Owens S, Breckons M. A systematic review of qualitative literature on antimicrobial stewardship in Sub-Saharan Africa. *Glob Health Res Policy*. 2021 Aug 20;6(1):31.
105. Li J, Zhou P, Wang J, Li H, Xu H, Meng Y, et al. Worldwide dispensing of non-prescription antibiotics in community pharmacies and associated factors: a mixed-methods systematic review. *Lancet Infect Dis* [Internet]. 2023 Apr 24 [cited 2023 Jul 13];0(0). Available from: [https://www.thelancet.com/journals/laninf/article/PIIS1473-3099\(23\)00130-5/fulltext#seccestitle190](https://www.thelancet.com/journals/laninf/article/PIIS1473-3099(23)00130-5/fulltext#seccestitle190)
106. Bell BG, Schellevis F, Stobberingh E, Goossens H, Pringle M. A systematic review and meta-analysis of the effects of antibiotic consumption on antibiotic resistance. *BMC Infect Dis*. 2014 Jan 9;14(1):13.
107. Moreno P, Cerón A, Sosa K, Morales M, Grajeda LM, Lopez MR, et al. Availability of over-the-counter antibiotics in Guatemalan corner stores. *PLoS ONE*. 2020 Sep 25;15(9):e0239873.
108. Singh S, Charani E, Devi S, Sharma A, Edathadathil F, Kumar A, et al. A road-map for addressing antimicrobial resistance in low- and middle-income countries: lessons learnt from the public

- private participation and co-designed antimicrobial stewardship programme in the State of Kerala, India. *Antimicrob Resist Infect Control*. 2021 Feb 11;10(1):32.
109. Wong LH, Tay E, Heng ST, Guo H, Kwa ALH, Ng TM, et al. Hospital Pharmacists and Antimicrobial Stewardship: A Qualitative Analysis. *Antibiot Basel Switz*. 2021 Nov 24;10(12):1441.
  110. Saha SK, Thursky K, Kong DCM, Mazza D. A Novel GPPAS Model: Guiding the Implementation of Antimicrobial Stewardship in Primary Care Utilising Collaboration between General Practitioners and Community Pharmacists. *Antibiot Basel Switz*. 2022 Aug 27;11(9):1158.
  111. Lawandi A, Kadri SS. Can financial rewards for stewardship in primary care curb antibiotic resistance? *Lancet Infect Dis*. 2021 Dec;21(12):1618–20.
  112. Medicine C for V. FDA. FDA; 2023 [cited 2023 Jul 13]. The National Antimicrobial Resistance Monitoring System. Available from: <https://www.fda.gov/animal-veterinary/antimicrobial-resistance/national-antimicrobial-resistance-monitoring-system>
  113. Pokhrel S, Anokye NK, Reidpath DD, Allotey P. Behaviour Change in Public Health: Evidence and Implications. *BioMed Res Int*. 2015;2015:598672.
  114. CFS\_WASH\_E\_web.pdf [Internet]. [cited 2023 Jul 13]. Available from: [https://inee.org/sites/default/files/resources/CFS\\_WASH\\_E\\_web.pdf](https://inee.org/sites/default/files/resources/CFS_WASH_E_web.pdf)
  115. Ma Z, Lee S, Jeong KC. Mitigating Antibiotic Resistance at the Livestock-Environment Interface:A Review. *J Microbiol Biotechnol*. 2019 Nov 28;29(11):1683–92.
  116. Sahoo KC, Tamhankar AJ, Johansson E, Stålsby Lundborg C. Community perceptions of infectious diseases, antibiotic use and antibiotic resistance in context of environmental changes: a study in Odisha, India. *Health Expect*. 2014;17(5):651–63.
  117. Roca I, Akova M, Baquero F, Carlet J, Cavaleri M, Coenen S, et al. The global threat of antimicrobial resistance: science for intervention. *New Microbes New Infect*. 2015 Jul 1;6:22–9.
  118. Cole J, Desphande J. Poultry farming, climate change, and drivers of antimicrobial resistance in India. *Lancet Planet Health*. 2019 Dec 1;3(12):e494–5.
  119. Moran D. Antimicrobial use and planetary health: developing a framework for priorities. *Lancet Planet Health*. 2018 Jul 1;2(7):e277–8.

**Table 1: Database search terms**

| <i>Criteria</i>          | <b>Embase</b>                                                                                                                                                                                                                                                                              |                          | <b>PubMed</b>                                                                                                                                                                                                                                                                                                                                                                                                                                                   |                          |
|--------------------------|--------------------------------------------------------------------------------------------------------------------------------------------------------------------------------------------------------------------------------------------------------------------------------------------|--------------------------|-----------------------------------------------------------------------------------------------------------------------------------------------------------------------------------------------------------------------------------------------------------------------------------------------------------------------------------------------------------------------------------------------------------------------------------------------------------------|--------------------------|
|                          | <b>Search Term</b>                                                                                                                                                                                                                                                                         | <b>Number of Results</b> | <b>Search Term</b>                                                                                                                                                                                                                                                                                                                                                                                                                                              | <b>Number of Results</b> |
| <i>Research Method</i>   | 'qualitative research'/exp OR 'qualitative research'                                                                                                                                                                                                                                       | 133,158                  | (qualitative research[MeSH Terms]) OR (qualitative[Text Word])                                                                                                                                                                                                                                                                                                                                                                                                  | 348,817                  |
| <i>Topic</i>             | 'antimicrobial stewardship'/exp OR 'antimicrobial stewardship' OR 'drug resistance'/exp OR 'drug resistance'                                                                                                                                                                               | 532,195                  | ((antimicrobial stewardship[MeSH Terms]) OR (drug resistance, microbial[MeSH Terms])) OR (antibiotic stewardship[Text Word])) OR (antibiotic resistance[Text Word])                                                                                                                                                                                                                                                                                             | 215,357                  |
| <i>Location</i>          | 'Afghanistan' OR 'Bangladesh' OR 'Bhutan' OR 'India' OR 'Maldives' OR 'Nepal' OR 'Pakistan' OR 'Sri Lanka'                                                                                                                                                                                 | 1,651,737                | (((((Afghanistan[Text Word]) OR (Bangladesh[Text Word])) OR (Bhutan[Text Word])) OR (India[Text Word])) OR (Maldives[Text Word])) OR (Nepal[Text Word])) OR (Pakistan[Text Word])) OR (Sri Lanka[Text Word])                                                                                                                                                                                                                                                    | 264,901                  |
| <i>Combined Criteria</i> | ('antimicrobial stewardship'/exp OR 'antimicrobial stewardship' OR 'drug resistance'/exp OR 'drug resistance') AND ('qualitative research'/exp OR 'qualitative research') AND ('afghanistan' OR 'bangladesh' OR 'bhutan' OR 'india' OR 'maldives' OR 'nepal' OR 'pakistan' OR 'sri lanka') | 90                       | (((((antimicrobial stewardship[MeSH Terms]) OR (drug resistance, microbial[MeSH Terms])) OR (antibiotic stewardship[Text Word])) OR (antibiotic resistance[Text Word])) AND ((qualitative research[MeSH Terms]) OR (qualitative[Text Word])) AND ((((((Afghanistan[Text Word]) OR (Bangladesh[Text Word])) OR (Bhutan[Text Word])) OR (India[Text Word])) OR (Maldives[Text Word])) OR (Nepal[Text Word])) OR (Pakistan[Text Word])) OR (Sri Lanka[Text Word])) | 75                       |

**Table 2: Operationalization of the social ecological framework**

| <b>Level</b>  | <b>Definition</b>                                                                  |
|---------------|------------------------------------------------------------------------------------|
| Individual    | Patients and their caregivers <sup>1</sup>                                         |
| Interpersonal | Formal health care workers                                                         |
| Facility      | Clinical settings                                                                  |
| Community     | Community practices and social norms, including informal drug vendors <sup>2</sup> |
| Policy        | Governance and legislation                                                         |

<sup>1</sup> We defined a caregiver as an adult who provides assistance to someone who needs help taking care of themselves including children, the elderly, or individuals with an illness or disability.

<sup>2</sup> We defined informal drug vendors as individuals who practice allopathic medicine and sell antimicrobials without having completed formal training at an accredited institution with a defined curriculum.

Figure 1. PRISMA flow diagram

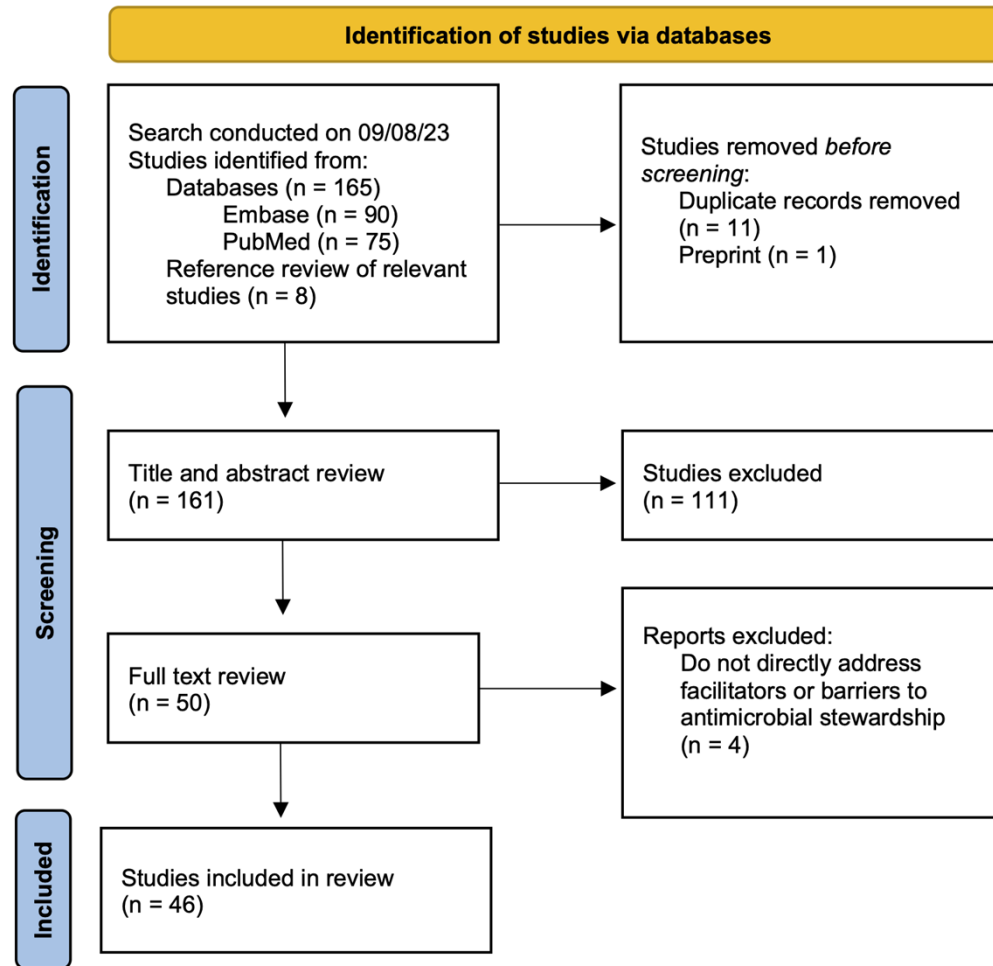

**Figure 2: Summary of themes across the social ecological framework**

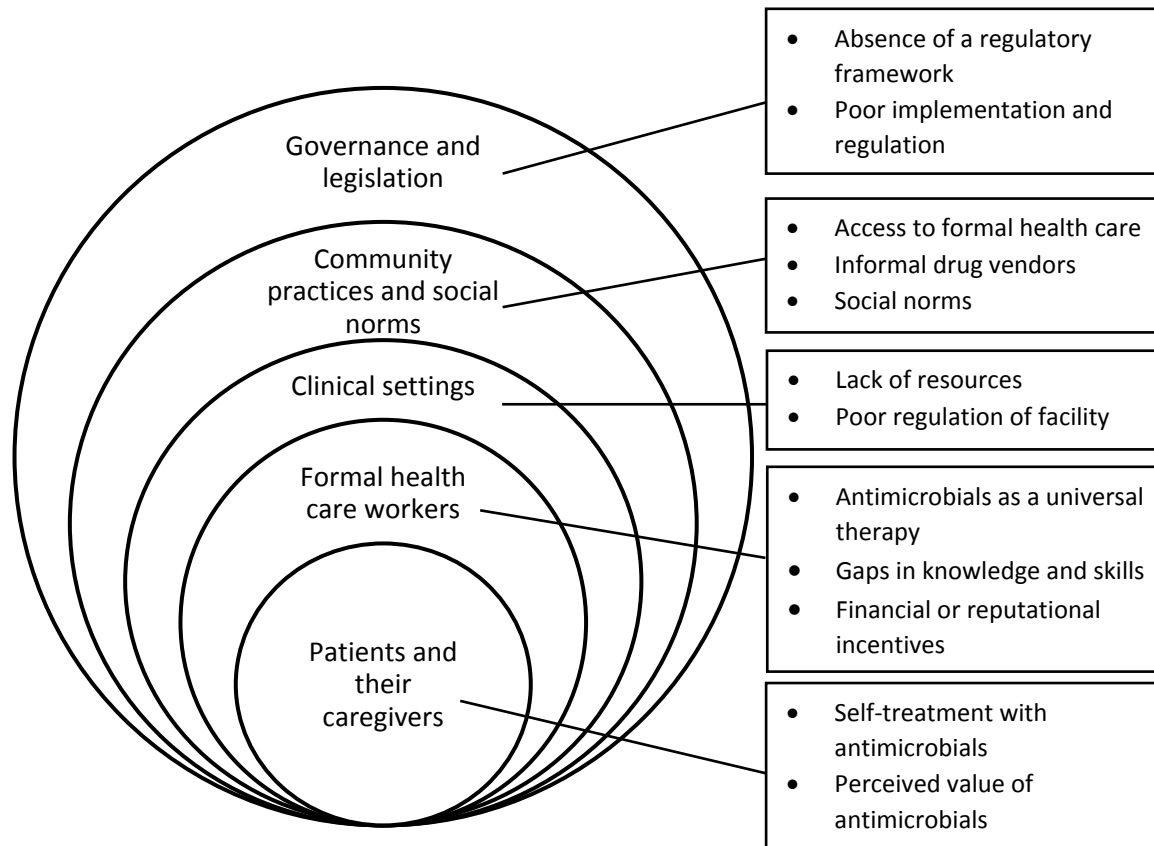

**Table 3: Description of included publications**

| <b>First Author &amp; Year</b> | <b>Title</b>                                                                                                                                             | <b>Research Aim</b>                                                                                                                                                | <b>Study Location</b> | <b>Qualitative methods</b>                                                                                                                       |
|--------------------------------|----------------------------------------------------------------------------------------------------------------------------------------------------------|--------------------------------------------------------------------------------------------------------------------------------------------------------------------|-----------------------|--------------------------------------------------------------------------------------------------------------------------------------------------|
| <i>Adhikari B 2021</i>         | Why do people purchase antibiotics over-the-counter? A qualitative study with patients, clinicians and dispensers in central, eastern and western Nepal  | Explore characteristics and drivers of over the counter sales of antibiotics and implications for policy                                                           | Nepal                 | 28 individual interviews and 12 focus group discussions with dispensers at drug stores, patients, and clinicians                                 |
| <i>Anwar M 2021</i>            | Exploring Nurses' Perception of Antibiotic Use and Resistance: A Qualitative Inquiry                                                                     | To highlight nurses' perception of antibiotic use and resistance                                                                                                   | Pakistan              | 15 individual interviews with nurses                                                                                                             |
| <i>Atif M 2019</i>             | What drives inappropriate use of antibiotics? A mixed methods study from Bahawalpur, Pakistan                                                            | To investigate the knowledge, attitudes, and practices of the general public regarding the use of antibiotics in community pharmacy                                | Pakistan              | 400 surveys and 16 individual interviews with patients and caregivers who have recently purchased antibiotics                                    |
| <i>Atif M 2020</i>             | Community pharmacists as antibiotic stewards: A qualitative study exploring the current status of Antibiotic Stewardship Program in Bahawalpur, Pakistan | To assess community pharmacists' knowledge, perceptions, and current practices regarding the WHO Global Action Plan antibiotic stewardship program                 | Pakistan              | 15 individual interviews with community pharmacists                                                                                              |
| <i>Atif M 2021</i>             | Antibiotic stewardship program in Pakistan: a multicenter qualitative study exploring medical doctors' knowledge, perception and practices               | To investigate knowledge, perspectives, and practices of physicians regarding the antibiotic stewardship program                                                   | Pakistan              | 17 individual interviews with doctors of tertiary care public sector hospitals                                                                   |
| <i>Barker A 2017</i>           | Social determinants of antibiotic misuse: a qualitative study of community members in Haryana, India                                                     | To assess the social determinants of antibiotic use among community members                                                                                        | India                 | 20 individual interviews with community members representative of a "typical" villager                                                           |
| <i>Barker A 2017</i>           | What drives inappropriate antibiotic dispensing? A mixed-methods study of pharmacy employee perspectives in Haryana, India                               | To better understand the factors that drive inappropriate antibiotic dispensing among pharmacy employees in India's village communities                            | India                 | 24 surveys and 20 individual interviews with community pharmacy employees                                                                        |
| <i>Baubie K 2019</i>           | Evaluating antibiotic stewardship in a tertiary care hospital in Kerala, India: a qualitative interview study                                            | To determine what barriers and facilitators to antibiotic stewardship exist within a 1300-bed tertiary care private hospital located in the state of Kerala, India | India                 | 31 semi-structured interviews and 4 focus groups with hospital staff ranging from physicians, nurses, pharmacists, and a clinical microbiologist |
| <i>Biswas D 2020</i>           | An ethnographic exploration of diarrheal disease management in public hospitals in Bangladesh: From problems to solutions                                | To characterize challenges faced in diarrheal disease management in resource-limited hospitals and identify opportunities to improve care                          | Bangladesh            | 138 individual interviews with clinicians, staff nurses and patients; rapid ethnographic observations                                            |



|                            |                                                                                                                                                                                                     |                                                                                                                                                         |                         |                                                                                                        |
|----------------------------|-----------------------------------------------------------------------------------------------------------------------------------------------------------------------------------------------------|---------------------------------------------------------------------------------------------------------------------------------------------------------|-------------------------|--------------------------------------------------------------------------------------------------------|
| <i>Broom A</i><br>2020     | Improvisation, therapeutic brokerage and antibiotic (mis)use in India: a qualitative interview study of Hyderabad physicians and pharmacists                                                        | To explore social dynamics around antimicrobials and report on provider accounts of antimicrobial resistance                                            | India                   | 3 interviews with 15 doctors and 15 pharmacists                                                        |
| <i>Broom J</i><br>2021     | Antimicrobial overuse in India: A symptom of broader societal issues including resource limitations and financial pressures                                                                         | To identify experiences of antimicrobial prescribing and perceived barriers to optimal use                                                              | India                   | 30 individual interviews with 15 doctors, 15 pharmacists                                               |
| <i>Chandy S</i><br>2013    | Antibiotic use and resistance: perceptions and ethical challenges among doctors, pharmacists and the public in Vellore, South India                                                                 | To inform stakeholder-targeted interventions to contain antibiotic use, gain support to address ethical issues, strengthen policy                       | India                   | 8 focus group discussions with urban and rural doctors, pharmacists, higher/lower socioeconomic public |
| <i>Charani E</i><br>2019   | Investigating the cultural and contextual determinants of antimicrobial stewardship programmes across low, middle- and high-income countries—A qualitative study                                    | To map the key contextual drivers of the development and implementation of antibiotic stewardship programs                                              | India (multi-site)      | 13 individual interviews from 7 hospitals                                                              |
| <i>Chowdhury M</i><br>2019 | Rural community perceptions of antibiotic access and understanding of antimicrobial resistance: qualitative evidence from the Health and Demographic Surveillance System site in Matlab, Bangladesh | To explore factors and practices around access and use of antibiotics in rural communities with a socio-cultural perspective                            | Bangladesh              | 6 focus group discussions and 16 individual interviews with residents                                  |
| <i>Darj E</i><br>2019      | Pharmacists' perception of their challenges at work, focusing on antimicrobial resistance: a qualitative study from Bangladesh                                                                      | To understand retail pharmacists' perceptions regarding antimicrobial resistance                                                                        | Bangladesh              | 24 individual interviews with retail pharmacists                                                       |
| <i>Do N</i><br>2021        | Community-based antibiotic access and use in six low-income and middle-income countries: a mixed-method approach                                                                                    | To compare community-based antibiotic access and use practices across communities in LMICs and identify contextually specific targets for interventions | Bangladesh (multi-site) | 16 individual interviews, 6 focus group discussions, 1100 surveys among drug suppliers and consumers   |
| <i>Farooqui M</i><br>2023  | Hospital Pharmacists' Viewpoint on Quality Use of Antibiotics and Resistance: A Qualitative Exploration from a Tertiary Care Hospital of Quetta City, Pakistan                                      | To evaluate hospital pharmacists' understanding of antibiotic use and resistance at a public healthcare institute in Quetta city                        | Pakistan                | 12 individual interviews with pharmacists                                                              |
| <i>Hayat K</i><br>2019     | Perspective of Pakistani Physicians towards Hospital Antimicrobial Stewardship Programs: A Multisite Exploratory Qualitative Study                                                                  | To explore physician views of antimicrobial resistance and the benefit of hospital stewardship programs                                                 | Pakistan                | 22 individual interviews with physicians from 7 tertiary care public hospitals                         |
| <i>Inchara M</i><br>2023   | 'Perceptions' and 'practices' to antibiotic usage among diabetic patients receiving care from a rural tertiary care center: A mixed-methods study                                                   | To assess the various practices related to antibiotic use such as completion of prescribed schedule, re-use of prescriptions,                           | India                   | 5 individual interviews with patients                                                                  |

|                      |                                                                                                                                                                                                                                        |                                                                                                                                                                                                                                                                                               |                       |                                                                                                                                                                         |
|----------------------|----------------------------------------------------------------------------------------------------------------------------------------------------------------------------------------------------------------------------------------|-----------------------------------------------------------------------------------------------------------------------------------------------------------------------------------------------------------------------------------------------------------------------------------------------|-----------------------|-------------------------------------------------------------------------------------------------------------------------------------------------------------------------|
|                      |                                                                                                                                                                                                                                        | over-the-counter purchase, use of leftover antibiotics in absence of medical advice, and others, and to explore the possible reasons for these practices in diabetic patients                                                                                                                 |                       |                                                                                                                                                                         |
| <i>Joseph H 2016</i> | What Happens When “Germs Don’t Get Killed and They Attack Again and Again”: Perceptions of Antimicrobial Resistance in the Context of Diarrheal Disease Treatment Among Laypersons and Health-Care Providers in Karachi, Pakistan      | To explore awareness of resistance, perceived causes, and potential solutions among a diverse sample of residents in a lower-middle-class community and a range of healthcare providers, including general practitioners, pharmacists and medical store owners, and unlicensed care providers | Pakistan              | 85 semi-structured interviews with 40 laypersons and 45 healthcare providers in a lower-middle-class urban neighborhood in Karachi, Pakistan                            |
| <i>Kalam A 2021</i>  | Understanding the social drivers of antibiotic use during COVID-19 in Bangladesh: Implications for reduction of antimicrobial resistance                                                                                               | To identify the social drivers of antibiotic use among home-based patients who have tested positive or have COVID19-like symptoms                                                                                                                                                             | Bangladesh            | 40 individual interviews with patients                                                                                                                                  |
| <i>Kalam A 2022</i>  | Antibiotics in the Community During the COVID-19 Pandemic: A Qualitative Study to Understand Users’ Perspectives of Antibiotic Seeking and Consumption Behaviors in Bangladesh                                                         | To document how antibiotic are sought and used during COVID-19 and determine the reasons why patients may utilize these medicines sub-optimally                                                                                                                                               | Bangladesh            | 40 individual interviews with people diagnosed with or had symptoms suggestive of COVID-19                                                                              |
| <i>Khan F 2021</i>   | Knowledge, Attitude, and Practice on Antibiotics and Its Resistance: A Two-Phase Mixed-Methods Online Study among Pakistani Community Pharmacists to Promote Rational Antibiotic Use                                                   | To investigate the knowledge, attitude, and practices of community pharmacists towards antibiotics, and to increase responsible use of antibiotics                                                                                                                                            | Pakistan              | 180 individual interviews with full and part-time community pharmacists                                                                                                 |
| <i>Khan F 2021</i>   | Exploring Undergraduate Pharmacy Students Perspectives Towards Antibiotics Use, Antibiotic Resistance, and Antibiotic Stewardship Programs Along With the Pharmacy Teachers’ Perspectives: A Mixed-Methods Study From Pakistan         | To investigate undergraduate students’ level of knowledge related to antibiotic resistance and stewardship, and pharmacy faculty roles in role in ABR/AMS plans                                                                                                                               | Pakistan              | 20 individual interviews with pharmacy teachers and 223 surveys of undergraduate pharmacy students from 12 universities                                                 |
| <i>Khan F 2022</i>   | Evaluation of Consumers Perspective on the Consumption of Antibiotics, Antibiotic Resistance, and Recommendations to Improve the Rational use of Antibiotics: An Exploratory Qualitative Study From Post-Conflicted Region of Pakistan | To investigate the knowledge, attitude, and practices on antibiotic consumption, antibiotic resistance, and related suggestions of residents                                                                                                                                                  | Pakistan              | 20 individual interviews with residents of conflicted zones                                                                                                             |
| <i>Khan M 2020</i>   | Is enhancing the professionalism of healthcare providers critical to tackling antimicrobial resistance in low- and middle-income countries?                                                                                            | To investigate whether weaknesses in health care providers' professionalism result in boundaries between "qualified" and "unqualified" providers being blurred, and how these weaknesses impact inappropriate provision of antibiotics in LMICs                                               | Pakistan (multi-site) | 85 individual interviews (39 in Pakistan) with providers, government health agencies, national AMR technical policy advisers, pharmaceutical industry staff, healthcare |

NGOs, and local representatives of international policy bodies

|                       |                                                                                                                                                                                     |                                                                                                                                                                                                                                                                                                                             |       |                                                                                                                                                                                                                              |
|-----------------------|-------------------------------------------------------------------------------------------------------------------------------------------------------------------------------------|-----------------------------------------------------------------------------------------------------------------------------------------------------------------------------------------------------------------------------------------------------------------------------------------------------------------------------|-------|------------------------------------------------------------------------------------------------------------------------------------------------------------------------------------------------------------------------------|
| <i>Khare S 2022</i>   | Understanding Internal and External Drivers Influencing the Prescribing Behaviour of Informal Healthcare Providers with Emphasis on Antibiotics in Rural India: A Qualitative Study | To analyze the internal and external drivers that influence informal health care providers' prescribing behaviors for common illnesses in children under five, especially in rural areas                                                                                                                                    | India | 7 focus group discussions with 48 informal health care providers                                                                                                                                                             |
| <i>Kotwani A 2010</i> | Factors influencing primary care physicians to prescribe antibiotics in Delhi India                                                                                                 | To explore the factors that influence primary care physicians to prescribe antibiotics and to investigate possible interventions                                                                                                                                                                                            | India | 3 focus group discussions with 36 primary care physicians in the public and private sectors                                                                                                                                  |
| <i>Kotwani A 2012</i> | Irrational use of antibiotics and role of the pharmacist: an insight from a qualitative study in New Delhi, India                                                                   | To understand the dispensing practices and behavior of community pharmacists to develop policy interventions that would improve the use of antibiotics at the community level                                                                                                                                               | India | 3 focus group discussions with 40 retail pharmacists, public sector pharmacists, and the office bearers of pharmacists' associations                                                                                         |
| <i>Kotwani A 2016</i> | Knowledge and perceptions on antibiotic use and resistance among high school students and teachers in New Delhi, India: A qualitative study                                         | To explore the perceptions and knowledge of schoolteachers and students about antibiotic use, resistance, and suggestions for practical interventions                                                                                                                                                                       | India | 5 focus group discussions with high school students (years 9–11) and 5 with teachers from private and public schools                                                                                                         |
| <i>Kotwani A 2017</i> | Prescriber and Dispenser Perceptions About Antibiotic Use in Acute Uncomplicated Childhood Diarrhea and Upper Respiratory Tract Infection in New Delhi: Qualitative Study           | To explore the prescribing practices, knowledge, and attitudes of primary care doctors and community pharmacists, regarding antibiotic use in acute upper respiratory tract infections (URTI) and diarrhea in children to better understand causes of misuse and identify opportunities and suggestions to change behaviors | India | 2 focus group discussions (8-12 participants) with primary care government doctors, private general practitioners, pediatricians, and community pharmacists. 22 individual semi-structured interviews with various providers |
| <i>Kotwani A 2021</i> | Knowledge and behavior of consumers towards the non-prescription purchase of antibiotics: An insight from a qualitative study from New Delhi, India                                 | To investigate the knowledge, practice, and behavior of consumers towards antibiotics, resistance, and purchasing behaviors, and to gain insight to inform evidence-based policy interventions                                                                                                                              | India | 72 individual interviews in 11 districts                                                                                                                                                                                     |
| <i>Kotwani A 2021</i> | Over-the-Counter Sale of Antibiotics in India: A Qualitative Study of Providers' Perspectives across Two States                                                                     | To gain insight into the OTC sale of antibiotics at retail pharmacies and explain its underlying drivers                                                                                                                                                                                                                    | India | 36 individual interviews with 22 pharmacists and 14 informal dispensers from 36 retail pharmacies                                                                                                                            |

|                        |                                                                                                                                                                                |                                                                                                                                                                                      |                               |                                                                                                                                                    |
|------------------------|--------------------------------------------------------------------------------------------------------------------------------------------------------------------------------|--------------------------------------------------------------------------------------------------------------------------------------------------------------------------------------|-------------------------------|----------------------------------------------------------------------------------------------------------------------------------------------------|
| <i>Kotwani A 2023</i>  | Strengthening antimicrobial stewardship activities in secondary and primary public healthcare facilities in India: Insights from a qualitative study with stakeholders         | To examine the existing federal and state policies in place that could strengthen antimicrobial stewardship activities in district and sub-district hospitals in India               | India                         | Individual interviews with 15 national/state policy makers and stakeholders who implement policy, such as physicians and administration            |
| <i>Lucas P 2019</i>    | Pathways to antibiotics in Bangladesh: A qualitative study investigating how and when households access medicine including antibiotics for humans or animals when they are ill | To explore how households in Bangladesh were accessing antimicrobials for themselves and their domestic animals                                                                      | Bangladesh                    | Individual interviews with 48 urban and rural households                                                                                           |
| <i>Maki G 2020</i>     | Feasibility Study of the World Health Organization Health Care Facility-Based Antimicrobial Stewardship Toolkit for Low- and Middle-Income Countries                           | To obtain local input on the WHO health facility antimicrobial stewardship toolkit content and implementation of the steward program                                                 | Nepal and Bhutan (multi-site) | Individual interviews with 12 policy makers, 21 hospital administrators, 20 physicians, 21 nurses, 11 pharmacists, and 13 laboratory techs         |
| <i>Mitchell J 2023</i> | Exploring the potential for children to act on antimicrobial resistance in Nepal: Valuable insights from secondary analysis of qualitative data                                | To consider the specific roles children and young people play in AMR-driving behaviors                                                                                               | Nepal                         | Secondary analysis of transcript data from focus group discussions and individual interviews with 23 adults engaged in an AMR-focused film project |
| <i>Nahar P 2020</i>    | What contributes to inappropriate antibiotic dispensing among qualified and unqualified healthcare providers in Bangladesh? A qualitative study                                | To explore knowledge surrounding the use and functions of antibiotics, awareness of antimicrobial resistance, and perceived patient or customer demand and adherence among providers | Bangladesh                    | 46 individual interviews with urban and rural community health care providers                                                                      |
| <i>Nair M 2019</i>     | “Without antibiotics, I cannot treat”: A qualitative study of antibiotic use in Paschim Bardhaman district of West Bengal, India                                               | To explore the drivers of antibiotic use among formal /informal healthcare providers and patients accessing care at primary health centers                                           | India                         | 28 individual interviews with allopathic doctors, informal health providers, nurses, pharmacy shopkeepers, and patients                            |
| <i>Nair M 2023</i>     | Perceptions of effective policy interventions and strategies to address antibiotic misuse within primary healthcare in India: A qualitative study                              | To assess perceptions of interventions and gaps in policy and practice with respect to outpatient antibiotic misuse in India                                                         | India                         | 23 individual interviews with individuals in academia, non-government organizations, policy, advocacy, pharmacy, and medicine                      |
| <i>Pearson M 2019</i>  | Knowing antimicrobial resistance in practice: a multi-country qualitative study with human and animal healthcare professionals                                                 | To investigate AMR awareness among human/animal healthcare professionals and the contextual issues influencing the relationship between awareness and                                | India (multi-site)            | Individual interviews and rapid ethnographic observation with healthcare professionals                                                             |

|                        |                                                                                                                                                                              | practices of antimicrobial prescribing and dispensing                                                                                                                                                   |                        |                                                                                                                                                |
|------------------------|------------------------------------------------------------------------------------------------------------------------------------------------------------------------------|---------------------------------------------------------------------------------------------------------------------------------------------------------------------------------------------------------|------------------------|------------------------------------------------------------------------------------------------------------------------------------------------|
| <i>Rofle R 2021</i>    | Barriers to implementing antimicrobial stewardship programs in three low and middle-income country tertiary care settings: findings from a multi-site qualitative study      | To determine perceived barriers to the development and implementation of antibiotic stewardship programs in tertiary care centers in three LIMCs                                                        | Sri Lanka (multi-site) | Individual interviews with 22 physicians at tertiary care hospitals                                                                            |
| <i>Sahoo K 2010</i>    | Antibiotic use, resistance development and environmental factors: a qualitative study among healthcare professionals in Orissa, India                                        | To explore physician, veterinarian, and drug dispenser opinions about antibiotic use and antibiotic resistance development in relation to environmental factors                                         | India                  | Individual interviews with 24 physicians, veterinarians, and drug dispensers in Orissa                                                         |
| <i>Saleem Z 2019</i>   | Antimicrobial prescribing and determinants of antimicrobial resistance: a qualitative study among physicians in Pakistan                                                     | To assess physician perception about antibiotic use and resistance, and factors influencing their prescribing of antibiotics and potential interventions to improve their future antibiotic prescribing | Pakistan               | Individual interviews with 15 physicians registered with the Pakistan Medical and Dental Association (PMDC)                                    |
| <i>Shrestha A 2023</i> | The Resistance Patterns in E. coli Isolates among Apparently Healthy Adults and Local Drivers of Antimicrobial Resistance: A Mixed-Methods Study in a Suburban Area of Nepal | To describe the antimicrobial resistance pattern in E. coli isolated from the fecal samples of apparently healthy individuals in Dhulikhel municipality and to explore the local drivers of AMR         | Nepal                  | Focus group discussions and individual interviews with pharmacy workers, food vendors, health coordinators, and community members in Dhulikhel |
| <i>Singh S 2021</i>    | Investigating infection management and antimicrobial stewardship in surgery: a qualitative study from India and South Africa                                                 | To investigate the drivers for infection management and antimicrobial stewardship across high-infection-risk surgical pathways                                                                          | India (multi-site)     | Case-studies, ethnographic observations, and individual interviews with 44 healthcare professionals and 6 patients                             |

**Table 4:** Emerging themes and short descriptions

| <b>Level</b>                                           | <b>Theme</b>                                 | <b>Description</b>                                                                                                                                                                                                                            |
|--------------------------------------------------------|----------------------------------------------|-----------------------------------------------------------------------------------------------------------------------------------------------------------------------------------------------------------------------------------------------|
| <b>Individual:</b> Patients and their caregivers       | <b>Self-treatment with antimicrobials</b>    | Patients forego formal health care and obtain antimicrobials through various means (e.g., purchasing antimicrobials without a prescription, using leftover antimicrobials, taking family and friends' prescriptions)                          |
|                                                        | <b>Perceived value of antimicrobials</b>     | Patients believe that usage of antimicrobials will cure them and alleviate their symptoms quickly. Antimicrobials are viewed as a universally effective drug for all symptoms/illnesses and are actively requested in clinical consultations. |
| <b>Interpersonal:</b> Formal health care workers       | <b>Antimicrobials as a universal therapy</b> | Physicians inappropriately recommend antimicrobial therapy to patients as a first step in treatment, often in the absence of diagnostics.                                                                                                     |
|                                                        | <b>Gaps in knowledge and skills</b>          | Many providers lack training or knowledge of antimicrobial stewardship. Those who do have knowledge of these issues may not translate these ideas into clinical practice.                                                                     |
|                                                        | <b>Financial or reputational incentives</b>  | Providers are likely to prescribe antimicrobials to receive financial incentive from pharmaceutical companies or retain patients by maintaining a reputation of being willing to prescribe antimicrobials.                                    |
| <b>Facility:</b> Clinical settings                     | <b>Lack of resources</b>                     | Lack of resources within facilities (e.g. space, time, providers, knowledge of programs, infrastructure, funding, etc.) that undermines quality care and leads to overuse of antimicrobials.                                                  |
|                                                        | <b>Poor regulation of facility</b>           | Facility procedures are not properly implemented or regulated. (e.g., drug reporting procedures, management of medication, pluralistic health care services, organization of the healthcare facility, etc.)                                   |
| <b>Community:</b> Community practices and social norms | <b>Access to formal healthcare</b>           | Structural barriers prevent patients accessing formal health care in their communities. In contrast, informal providers are perceived as relatively easy, timely, and cost-effective, and readily provide antimicrobials.                     |
|                                                        | <b>Informal drug vendors</b>                 | Pharmacies, medical shops, and informal health care providers in the wider community provide antimicrobials to patients without requiring lab testing, office visits, formal prescriptions, etc.                                              |

|                                           |                                           |                                                                                                                           |
|-------------------------------------------|-------------------------------------------|---------------------------------------------------------------------------------------------------------------------------|
|                                           | <b>Social norms</b>                       | The use and sharing of antimicrobials are widely accepted as a normal and common practice.                                |
| <i>Policy: Governance and legislation</i> | <b>Poor implementation and regulation</b> | Existing policies are poorly implemented or not regulated by the government.                                              |
|                                           | <b>Absence of a regulatory framework</b>  | Lack of policy and implementation frameworks addressing proper antimicrobial use, stewardship, and prescribing practices. |
